# Supplementary material
Source: publisher figshare collection journal article supplement (https://gsajournals.figshare.com/ndownloader/files/15090290)
Supplement: Supplementary file 1 [file 15090290]

## Sheet: Sheet1
File S12. List of GO terms for downregulated genes in ve-1 mutant in both conditions
Biological Process	Genes
oxidation-reduction process (GO:0055114)	27
transmembrane transport (GO:0055085)	18
carbohydrate metabolic process (GO:0005975)	17
regulation of transcription, DNA-templated (GO:0006355)	16
metabolic process (GO:0008152)	12
lipid metabolic process (GO:0006629)	7
transport (GO:0006810)	6
protein phosphorylation (GO:0006468)	5
response to stress (GO:0006950)	4
transcription, DNA-templated (GO:0006351)	4
proteolysis (GO:0006508)	3
glycolytic process (GO:0006096)	2
metal ion transport (GO:0030001)	2
Other	26
Other terms:
G-protein coupled receptor signaling pathway (GO:0007186)	1
L-arabinose metabolic process (GO:0046373)	1
RNA polyadenylation (GO:0043631)	1
amino acid transmembrane transport (GO:0003333)	1
ammonium transport (GO:0015696)	1
arabinan metabolic process (GO:0031221)	1
biosynthetic process (GO:0009058)	1
dephosphorylation (GO:0016311)	1
glycerol metabolic process (GO:0006071)	1
glycogen biosynthetic process (GO:0005978)	1
intracellular signal transduction (GO:0035556)	1
lipid glycosylation (GO:0030259)	1
mannose metabolic process (GO:0006013)	1
mismatch repair (GO:0006298)	1
mitochondrial respiratory chain complex III assembly (GO:0034551)	1
mycotoxin biosynthetic process (GO:0043386)	1
nickel cation transmembrane transport (GO:0035444)	1
nitrogen compound metabolic process (GO:0006807)	1
nucleobase-containing compound metabolic process (GO:0006139)	1
potassium ion transmembrane transport (GO:0071805)	1
protein deubiquitination (GO:0016579)	1
protein peptidyl-prolyl isomerization (GO:0000413)	1
response to oxidative stress (GO:0006979)	1
signal transduction (GO:0007165)	1
tRNA splicing, via endonucleolytic cleavage and ligation (GO:0006388)	1
xylan catabolic process (GO:0045493)	1
Biological Process	Genes
oxidation-reduction process (GO:0055114)	27
transmembrane transport (GO:0055085)	18
carbohydrate metabolic process (GO:0005975)	17
regulation of transcription, DNA-templated (GO:0006355)	16
metabolic process (GO:0008152)	12
lipid metabolic process (GO:0006629)	7
transport (GO:0006810)	6
protein phosphorylation (GO:0006468)	5
response to stress (GO:0006950)	4
transcription, DNA-templated (GO:0006351)	4
proteolysis (GO:0006508)	3
glycolytic process (GO:0006096)	2
metal ion transport (GO:0030001)	2
G-protein coupled receptor signaling pathway (GO:0007186)	1
L-arabinose metabolic process (GO:0046373)	1
RNA polyadenylation (GO:0043631)	1
amino acid transmembrane transport (GO:0003333)	1
ammonium transport (GO:0015696)	1
arabinan metabolic process (GO:0031221)	1
biosynthetic process (GO:0009058)	1
dephosphorylation (GO:0016311)	1
glycerol metabolic process (GO:0006071)	1
glycogen biosynthetic process (GO:0005978)	1
intracellular signal transduction (GO:0035556)	1
lipid glycosylation (GO:0030259)	1
mannose metabolic process (GO:0006013)	1
mismatch repair (GO:0006298)	1
mitochondrial respiratory chain complex III assembly (GO:0034551)	1
mycotoxin biosynthetic process (GO:0043386)	1
nickel cation transmembrane transport (GO:0035444)	1
nitrogen compound metabolic process (GO:0006807)	1
nucleobase-containing compound metabolic process (GO:0006139)	1
potassium ion transmembrane transport (GO:0071805)	1
protein deubiquitination (GO:0016579)	1
protein peptidyl-prolyl isomerization (GO:0000413)	1
response to oxidative stress (GO:0006979)	1
signal transduction (GO:0007165)	1
tRNA splicing, via endonucleolytic cleavage and ligation (GO:0006388)	1
xylan catabolic process (GO:0045493)	1
